# Supplementary material for: Genome-Wide Mapping of Collier In Vivo Binding Sites Highlights Its Hierarchical Position in Different Transcription Regulatory Networks
Source: PubMed Central journal article supplement (PMC4512700; doi:10.1371/journal.pone.0133387), 2015-07-23
Supplement: pone.0133387.s009.pdf [file pone.0133387.s009.pdf]

Table S1: 415 genes bound by Col in vivo.

/ peak overlapping two genes  
 #intragenic for sub5' side for pdm2  
 \*Curated annotation from Kwon et al., Nature, 2014 (Supplementary table 4)  
 \*\*Curated annotation from REDfly 3.3

| Gene name | Number of Col peaks | Peaks positions and heights                                                                                                                                                                                                        | Peaks coordinates                                                                                                                                                                                                                               | Gene Annotation symbol | Flybase ID  |
|-----------|---------------------|------------------------------------------------------------------------------------------------------------------------------------------------------------------------------------------------------------------------------------|-------------------------------------------------------------------------------------------------------------------------------------------------------------------------------------------------------------------------------------------------|------------------------|-------------|
| sick      | 9                   | sick_Intragenic_(4,1)<br>sick_Intragenic_(4)<br>sick_Intragenic_(3,68)<br>sick_Intragenic_(3,31)<br>sick_Intragenic_(3,13)<br>sick_Intragenic_(2,53)<br>sick_Intragenic_(2,41)<br>sick_Intragenic_(2,29)<br>sick_Intragenic_(2,19) | chr2L:19829551-19829552<br>chr2L:19829831-19829832<br>chr2L:19908161-19908162<br>chr2L:19802561-19802562<br>chr2L:19893371-19893372<br>chr2L:19837151-19837152<br>chr2L:19831581-19831582<br>chr2L:19838841-19838842<br>chr2L:19807211-19807212 | CG43720                | FBgn0263873 |
| sli       | 7                   | sli_Intragenic_(7,51)<br>sli_Intragenic_(4,68)<br>sli_Intragenic_(4)<br>sli_Intragenic_(2,87)<br>sli_Intragenic_(2,62)<br>sli_Intragenic_(2,52)<br>sli_Intragenic_(2,2)                                                            | chr2R:11783131-11783132<br>chr2R:11800571-11800572<br>chr2R:11798141-11798142<br>chr2R:11779551-11779552<br>chr2R:11808281-11808282<br>chr2R:11800021-11800022<br>chr2R:11799411-11799412                                                       | CG43758                | FBgn0264089 |
| Oaz       | 6                   | Oaz_Intragenic_(16,17)<br>Oaz_5' side_(8,51)<br>Oaz_Intragenic_(5,12)<br>Oaz_Intragenic_(2,23)<br>Oaz_Intragenic_(2,15)<br>Oaz_Intragenic_(2,02)                                                                                   | chr2R:10325311-10325312<br>chr2R:10323251-10323252<br>chr2R:10340171-10340172<br>chr2R:10327301-10327302<br>chr2R:10327671-10327672<br>chr2R:10333611-10333612                                                                                  | CG42702                | FBgn0261613 |
| hth       | 5                   | hth_Intragenic_(3,57)<br>hth_Intragenic_(2,96)<br>hth_Intragenic_(2,58)<br>hth_3' side_(2,56)<br>hth_Intragenic_(2,42)                                                                                                             | chr3R:6402141-6402142<br>chr3R:6339011-6339012<br>chr3R:6402641-6402642<br>chr3R:6324751-6324752<br>chr3R:6462431-6462432                                                                                                                       | CG17117                | FBgn0001235 |
| CG34380   | 5                   | CG34380_Intragenic_(3,11)<br>CG34380_Intragenic_(2,71)<br>CG34380_Intragenic_(2,66)<br>CG34380_Intragenic_(2,26)<br>CG34380_Intragenic_(1,95)                                                                                      | chr2L:6183651-6183652<br>chr2L:6202631-6202632<br>chr2L:6203041-6203042<br>chr2L:6199411-6199412<br>chr2L:6205381-6205382                                                                                                                       | CG34380                | FBgn0085409 |
| olf413    | 5                   | olf413_Intragenic_(3,95)<br>olf413_Intragenic_(3,43)<br>olf413_Intragenic_(2,85)<br>olf413_Intragenic_(2,5)<br>olf413_Intragenic_(2,34)                                                                                            | chr3L:22192391-22192392<br>chr3L:22188491-22188492<br>chr3L:22193631-22193632<br>chr3L:22190781-22190782<br>chr3L:22167701-22167702                                                                                                             | CG12673                | FBgn0037153 |
| snky      | 4                   | snky_3' side_(3,68)<br>snky_3' side_(2,83)<br>snky_3' side_(2,81)<br>snky_3' side_(2,09)                                                                                                                                           | chr3L:13182171-13182172<br>chr3L:13182711-13182712<br>chr3L:13187131-13187132<br>chr3L:13181881-13181882                                                                                                                                        | CG11281                | FBgn0086916 |
| CG44014   | 4                   | CG44014_5' side_(4,8)<br>CG44014_5' side_(3,13)<br>CG44014_5' side_(2,87)<br>CG44014_5' side_(2,78)                                                                                                                                | chr3R:11338151-11338152<br>chr3R:11344411-11344412<br>chr3R:11338391-11338392<br>chr3R:11344051-11344052                                                                                                                                        | CG44014                | FBgn0264776 |
| Antp      | 4                   | Antp_Intragenic_(5,22)<br>Antp_5' side_(4,72)<br>Antp_Intragenic_(2,87)<br>Antp_Intragenic_(2,37)                                                                                                                                  | chr3R:2746971-2746972<br>chr3R:2834151-2834152<br>chr3R:2778591-2778592<br>chr3R:2816851-2816852                                                                                                                                                | CG1028                 | FBgn0260642 |
| px        | 4                   | px_Intragenic_(9,48)<br>px_Intragenic_(3,46)<br>px_Intragenic_(2,32)<br>px_Intragenic_(2,24)                                                                                                                                       | chr2R:18420911-18420912<br>chr2R:18399351-18399352<br>chr2R:18412951-18412952<br>chr2R:18398041-18398042                                                                                                                                        | CG4444                 | FBgn0003175 |
| jing      | 4                   | jing_Intragenic_(6,06)<br>jing_Intragenic_(5,2)<br>jing_Intragenic_(5,17)<br>jing_Intragenic_(4,94)                                                                                                                                | chr2R:2426211-2426212<br>chr2R:2421711-2421712<br>chr2R:2482581-2482582<br>chr2R:2447621-2447622                                                                                                                                                | CG9397                 | FBgn0086655 |
| CG42342   | 4                   | CG42342_Intragenic_(4,38)<br>CG42342_Intragenic_(4,37)<br>CG42342_Intragenic_(3,23)<br>CG42342_Intragenic_(2,01)                                                                                                                   | chr3R:12391431-12391432<br>chr3R:12330171-12330172<br>chr3R:12386031-12386032<br>chr3R:12378161-12378162                                                                                                                                        | CG42342                | FBgn0259244 |
| pum       | 4                   | pum_Intragenic_(7,83)<br>pum_Intragenic_(5,74)<br>pum_Intragenic_(3,86)<br>pum_Intragenic_(3,43)                                                                                                                                   | chr3R:4970751-4970752<br>chr3R:4909131-4909132<br>chr3R:5007181-5007182<br>chr3R:4953951-4953952                                                                                                                                                | CG9755                 | FBgn0003165 |
| drl       | 3                   | drl_Intragenic_(2,95)<br>drl_3' side_(2,6)<br>drl_Intragenic_(2,11)                                                                                                                                                                | chr2L:19202581-19202582<br>chr2L:19236521-19236522<br>chr2L:19199741-19199742                                                                                                                                                                   | CG17348                | FBgn0015380 |
| CG42238   | 3                   | CG42238_Intragenic_(3,07)<br>CG42238_3' side_(2,98)<br>CG42238_Intragenic_(2,8)                                                                                                                                                    | chr2L:21001451-21001452<br>chr2L:20951751-20951752<br>chr2L:20998911-20998912                                                                                                                                                                   | CG42238                | FBgn0250867 |
| CG43202   | 3                   | CG43202_3' side_(3,6)<br>CG43202_5' side_(2,37)<br>CG43202_3' side_(2,05)                                                                                                                                                          | chr2R:14268471-14268472<br>chr2R:14262961-14262962<br>chr2R:14266241-14266242                                                                                                                                                                   | CG43202                | FBgn0262838 |
| CG42831   | 3                   | CG42831_3' side_(6,96)<br>CG42831_5' side_(2,95)<br>CG42831_5' side_(2,83)                                                                                                                                                         | chr3L:10819391-10819392<br>chr3L:10804351-10804352<br>chr3L:10803431-10803432                                                                                                                                                                   | CG42831                | FBgn0262020 |
| CG13898   | 3                   | CG13898_5' side_(3,5)<br>CG13898_3' side_(3,11)<br>CG13898_3' side_(2,56)                                                                                                                                                          | chr3L:815251-815252<br>chr3L:802601-802602<br>chr3L:795511-795512                                                                                                                                                                               | CG13898                | FBgn0035161 |
| CG1789    | 3                   | CG1789_3' side_(6,44)<br>CG1789_3' side_(5,02)<br>CG1789_3' side_(3,68)                                                                                                                                                            | chrX:8621151-8621152<br>chrX:8630751-8630752<br>chrX:8619641-8619642                                                                                                                                                                            | CG1789                 | FBgn0030063 |
| CG15283   | 3                   | CG15283_5' side_(4,26)<br>CG15283_5' side_(2,95)<br>CG15283_5' side_(2,31)                                                                                                                                                         | chr2L:14456611-14456612<br>chr2L:14454631-14454632<br>chr2L:14459681-14459682                                                                                                                                                                   | CG15283                | FBgn0028844 |
| CG15711   | 3                   | CG15711_5' side_(3,18)<br>CG15711_5' side_(3,18)<br>CG15711_5' side_(2,2)                                                                                                                                                          | chr2R:12258771-12258772<br>chr2R:12259731-12259732<br>chr2R:12256951-12256952                                                                                                                                                                   | CG15711                | FBgn0034122 |
| Best4     | 3                   | Best4_5' side_(3,66)<br>Best4_5' side_(3,11)<br>Best4_5' side_(3)                                                                                                                                                                  | chr3L:15278851-15278852<br>chr3L:15265611-15265612<br>chr3L:15268391-15268392                                                                                                                                                                   | CG7259                 | FBgn0036491 |
| CG2022    | 3                   | CG2022_5' side_(7,12)<br>CG2022_5' side_(6,51)<br>CG2022_Intragenic_(2,94)                                                                                                                                                         | chr3R:862051-862052<br>chr3R:851351-851352<br>chr3R:851711-851712                                                                                                                                                                               | CG2022                 | FBgn0037292 |
| OdsH      | 3                   | OdsH_Intragenic_(5,7)<br>OdsH_5' side_(4,45)<br>OdsH_5' side_(2,51)                                                                                                                                                                | chrX:17693151-17693152<br>chrX:17677721-17677722<br>chrX:17675931-17675932                                                                                                                                                                      | CG6352                 | FBgn0026058 |
| Trim9     | 3                   | Trim9_Intragenic_(4,82)<br>Trim9_Intragenic_(4,18)<br>Trim9_Intragenic_(2,44)                                                                                                                                                      | chr2L:10621121-10621122<br>chr2L:10550561-10550562<br>chr2L:10566711-10566712                                                                                                                                                                   | CG31721                | FBgn0051721 |

|           |   |                                                                                                    |                                                                                                          |         |             |
|-----------|---|----------------------------------------------------------------------------------------------------|----------------------------------------------------------------------------------------------------------|---------|-------------|
| kn        | 3 | kn_Intragenic (3,55)<br>kn_Intragenic (3,26)<br>kn_Intragenic (2,66)                               | chr2R:10687091-10687092<br>chr2R:10688181-10688182<br>chr2R:10690401-10690402                            | CG10197 | FBgn0001319 |
| unc-5     | 3 | unc-5_Intragenic (5,09)<br>unc-5_Intragenic (4,53)<br>unc-5_Intragenic (3,13)                      | chr2R:11250491-11250492<br>chr2R:11249331-11249332<br>chr2R:11240911-11240912                            | CG8166  | FBgn0034013 |
| sbb       | 3 | sbb_Intragenic (3,63)<br>sbb_Intragenic (3,33)<br>sbb_Intragenic (2,2)                             | chr2R:14226631-14226632<br>chr2R:14228931-14228932<br>chr2R:14225321-14225322                            | CG5580  | FBgn0010575 |
| Ten-a     | 3 | Ten-a_Intragenic (5,99)<br>Ten-a_Intragenic (2,96)                                                 | chrX:12161541-12161542<br>chrX:12110431-12110432<br>chrX:12106991-12106992                               | CG42338 | FBgn0267001 |
| CG17349   | 2 | CG17349_3' side (7,07)<br>CG17349_3' side (2,57)                                                   | chr2L:19374411-19374412<br>chr2L:19375251-19375252                                                       | CG17349 | FBgn0032771 |
| CG10195   | 2 | CG10195_3' side (2,64)<br>CG10195_3' side (2,6)                                                    | chr2L:19481471-19481472<br>chr2L:19480761-19480762                                                       | CG10195 | FBgn0032787 |
| CG11629   | 2 | CG11629_3' side (2,4)<br>CG11629_3' side (2,27)                                                    | chr2L:21896451-21896452<br>chr2L:21893151-21893152                                                       | CG11629 | FBgn0032965 |
| RYBP      | 2 | RYBP_3' side (6,46)<br>RYBP_3' side (3,3)                                                          | chr2R:18563271-18563272<br>chr2R:18565251-18565252                                                       | CG12190 | FBgn0034763 |
| CG13323   | 2 | CG13323_3' side (4,3)<br>CG13323_3' side (3,76)                                                    | chr2R:8917751-8917752<br>chr2R:8915671-8915672                                                           | CG13323 | FBgn0033788 |
| CG7255    | 2 | CG7255_3' side (6,51)<br>CG7255_3' side (2,47)                                                     | chr3L:15304491-15304492<br>chr3L:15304961-15304962                                                       | CG7255  | FBgn0036493 |
| Toll-6    | 2 | Toll-6_3' side (7)<br>Toll-6_5' side (2,94)                                                        | chr3L:15342011-15342012<br>chr3L:15327091-15327092                                                       | CG7250  | FBgn0036494 |
| CG33259   | 2 | CG33259_5' side (2,34)<br>CG33259_3' side (2,22)                                                   | chr3L:15387511-15387512<br>chr3L:15413771-15413772                                                       | CG33259 | FBgn0036495 |
| msopa     | 2 | msopa_3' side (3,59)<br>msopa_5' side (3,03)                                                       | chr3L:22077131-22077132<br>chr3L:22075481-22075482                                                       | CG14560 | FBgn0004414 |
| Trxr-2    | 2 | Trxr-2_3' side (2,37)<br>Trxr-2_3' side (2,01)                                                     | chr3L:22568361-22568362<br>chr3L:22561671-22561672                                                       | CG11401 | FBgn0037170 |
| Rh50      | 2 | Rh50_3' side (4,25)<br>Rh50_3' side (3,04)                                                         | chr3L:4922511-4922512<br>chr3L:4920891-4920892                                                           | CG7499  | FBgn0028699 |
| abd-A     | 2 | abd-A_3' side (2,96)<br>abd-A_Intragenic (2,25)*<br>CG7956_3' side (4,74)<br>CG7956_5' side (2,26) | chr3R:12629961-12629962<br>chr3R:12637631-12637632<br>chr3R:17359891-17359892<br>chr3R:17344691-17344692 | CG10325 | FBgn0000014 |
| CG7956    | 2 | CG43447_3' side (2,58)<br>CG43447_3' side (2,22)                                                   | chr3R:2326651-2326652<br>chr3R:23270111-23270112                                                         | CG7956  | FBgn0038890 |
| CG43447   | 2 | Cyp12e1_3' side (2,92)<br>Cyp12e1_3' side (2,15)                                                   | chr3R:6321711-6321712<br>chr3R:6319871-6319872                                                           | CG43447 | FBgn0263401 |
| Cyp12e1   | 2 | CG4161_5' side (5,37)<br>CG4161_5' side (3,45)                                                     | chr2L:15429871-15429872<br>chr2L:15430251-15430252                                                       | CG4161  | FBgn0028892 |
| Oli       | 2 | Oli_5' side (5,08)<br>Oli_5' side (4,64)                                                           | chr2L:17586271-17586272<br>chr2L:17583851-17583852                                                       | CG5545  | FBgn0032651 |
| tup       | 2 | tup_5' side (3,77)<br>tup_Intragenic (2,54)                                                        | chr2L:18897331-18897332<br>chr2L:18867991-18867992                                                       | CG10619 | FBgn0033896 |
| CG17350   | 2 | CG17350_5' side (6,24)<br>CG17350_5' side (2,53)                                                   | chr2L:19378291-19378292<br>chr2L:19376771-19376772                                                       | CG17350 | FBgn0032772 |
| ed        | 2 | ed_5' side (3,39)<br>ed_Intragenic (2,71)                                                          | chr2L:4023581-4023582<br>chr2L:4034081-4034082                                                           | CG12676 | FBgn0000547 |
| Rca1      | 2 | Rca1_5' side (4,61)<br>Rca1_5' side (2,98)                                                         | chr2L:6842591-6842592<br>chr2L:6841771-6841772                                                           | CG10800 | FBgn0017551 |
| CG33467   | 2 | CG33467_5' side (3,19)<br>CG33467_5' side (2,65)                                                   | chr2R:10959811-10959812<br>chr2R:10960431-10960432                                                       | CG33467 | FBgn0053467 |
| CG15925   | 2 | CG15925_5' side (3,58)<br>CG15925_5' side (2,55)                                                   | chr2R:12333021-12333022<br>chr2R:12332571-12332572                                                       | CG15925 | FBgn0034129 |
| ap        | 2 | ap_5' side (5,4)<br>ap_5' side (2,02)**<br>mirr_5' side (2,64)<br>mirr_5' side (2,3)               | chr2R:16246091-16246092<br>chr2R:1629081-1629082<br>chr3L:12686351-12686352<br>chr3L:12681671-12681672   | CG8376  | FBgn0267978 |
| mirr      | 2 | mirr_5' side (2,64)<br>mirr_5' side (2,3)                                                          | chr3L:12686351-12686352<br>chr3L:12681671-12681672                                                       | CG10601 | FBgn0014343 |
| fz        | 2 | fz_Intragenic (5,41)<br>fz_5' side (3,38)                                                          | chr3L:14297011-14297012<br>chr3L:14256271-14256272                                                       | CG17697 | FBgn0001085 |
| CG7304    | 2 | CG7304_5' side (4,83)<br>CG7304_5' side (2,02)                                                     | chr3L:15671781-15671782<br>chr3L:15666761-15666762                                                       | CG7304  | FBgn0036527 |
| Mip       | 2 | Mip_Intragenic (3,09)<br>Mip_5' side (2,63)                                                        | chr3L:17339541-17339542<br>chr3L:17343171-17343172                                                       | CG6456  | FBgn0036713 |
| CG43335   | 2 | CG43335_5' side (6,15)<br>CG43335_5' side (4,09)                                                   | chr3R:11442091-11442092<br>chr3R:11443711-11443712                                                       | CG43335 | FBgn0263040 |
| pxb       | 2 | pxb_5' side (2,81)<br>pxb_Intragenic (2,58)                                                        | chr3R:11478791-11478792<br>chr3R:11509091-11509092                                                       | CG33207 | FBgn0053207 |
| CG4704    | 2 | CG4704_5' side (3,68)<br>CG4704_5' side (2,48)                                                     | chr3R:18687811-18687812<br>chr3R:18671611-18671612                                                       | CG4704  | FBgn0039029 |
| klg       | 2 | klg_5' side (3,51)<br>klg_Intragenic (3,02)                                                        | chr3R:18699531-18699532<br>chr3R:18757841-18757842                                                       | CG6669  | FBgn0017590 |
| laf       | 2 | laf_5' side (2,48)<br>laf_5' side (2,27)                                                           | chr3R:708391-708392<br>chr3R:712371-712372                                                               | CG14660 | FBgn0020280 |
| ci        | 2 | ci_5' side (6,33)<br>ci_5' side (5,7)                                                              | chr4:81301-81302<br>chr4:81371-81372                                                                     | CG2125  | FBgn0004859 |
| Sox102F   | 2 | Sox102F_Intragenic (3)<br>Sox102F_5' side (2,41)                                                   | chr4:835331-835332<br>chr4:854811-854812                                                                 | CG11153 | FBgn0039938 |
| aret      | 2 | aret_Intragenic (2,92)<br>aret_Intragenic (2,36)                                                   | chr2L:12252391-12252392<br>chr2L:12263811-12263812                                                       | CG31762 | FBgn0000114 |
| CadN      | 2 | CadN_Intragenic (2,59)<br>CadN_Intragenic (2,51)                                                   | chr2L:17764371-17764372<br>chr2L:17723321-17723322                                                       | CG7100  | FBgn0015609 |
| Lim3      | 2 | Lim3_Intragenic (3,66)<br>Lim3_Intragenic (2,66)                                                   | chr2L:19103911-19103912<br>chr2L:19090791-19090792                                                       | CG10699 | FBgn0002023 |
| VGlut     | 2 | VGlut_Intragenic (6,02)<br>VGlut_Intragenic (3,71)                                                 | chr2L:2404501-2404502<br>chr2L:2393891-2393892                                                           | CG9887  | FBgn0031424 |
| DIP-theta | 2 | DIP-theta_Intragenic (2,44)<br>DIP-theta_Intragenic (1,97)                                         | chr2L:5628811-5628812<br>chr2L:5631931-5631932                                                           | CG31646 | FBgn0051646 |
| eya       | 2 | eya_Intragenic (3,99)<br>eya_Intragenic (2,39)                                                     | chr2L:6541031-6541032<br>chr2L:6540661-6540662                                                           | CG9554  | FBgn0000320 |
| Rapgap1   | 2 | Rapgap1_Intragenic (2,64)<br>Rapgap1_Intragenic (2,17)                                             | chr2L:7560721-7560722<br>chr2L:7539011-7539012                                                           | CG44086 | FBgn0264895 |
| Snoo      | 2 | Snoo_Intragenic (3,57)<br>Snoo_Intragenic (2,42)                                                   | chr2L:7963381-7963382<br>chr2L:7933371-7933372                                                           | CG34421 | FBgn0085450 |
| Sema-2b   | 2 | Sema-2b_Intragenic (2,74)<br>Sema-2b_Intragenic (2,41)                                             | chr2R:12296671-12296672<br>chr2R:12293631-12293632                                                       | CG33960 | FBgn0264273 |
| mbi       | 2 | mbi_Intragenic (4,13)<br>mbi_Intragenic (2,61)                                                     | chr2R:13223611-13223612<br>chr2R:13206431-13206432                                                       | CG33197 | FBgn0265487 |
| otp       | 2 | otp_Intragenic (4,91)<br>otp_Intragenic (2,02)                                                     | chr2R:16779011-16779012<br>chr2R:16776011-16776012                                                       | CG10036 | FBgn0015524 |
| CG34371   | 2 | CG34371_Intragenic (4,42)<br>CG34371_Intragenic (2,67)                                             | chr2R:1909691-1909692<br>chr2R:19085441-19085442                                                         | CG34371 | FBgn0085400 |
| pk        | 2 | pk_Intragenic (3,44)<br>pk_Intragenic (3,33)                                                       | chr2R:3046271-3046272<br>chr2R:3058031-3058032                                                           | CG11084 | FBgn003090  |
| luna      | 2 | luna_Intragenic (2,78)<br>luna_Intragenic (2,55)                                                   | chr2R:6943151-6943152<br>chr2R:6981391-6981392                                                           | CG33473 | FBgn0040765 |
| fas       | 2 | fas_Intragenic (3,43)<br>fas_Intragenic (3,41)                                                     | chr2R:9609291-9609292<br>chr2R:9625651-9625652                                                           | CG17716 | FBgn0000633 |
| bru-3     | 2 | bru-3_Intragenic (2,85)<br>bru-3_Intragenic (1,97)                                                 | chr3L:13644431-13644432<br>chr3L:13759491-13759492                                                       | CG43744 | FBgn0264001 |
| comm3     | 2 | comm3_Intragenic (3,09)<br>comm3_Intragenic (2,65)                                                 | chr3L:15607591-15607592<br>chr3L:15610261-15610262                                                       | CG42334 | FBgn0259236 |
| Mipp1     | 2 | Mipp1_Intragenic (3,01)<br>Mipp1_Intragenic (2,19)                                                 | chr3L:16564201-16564202<br>chr3L:16562591-16562592                                                       | CG4123  | FBgn0026061 |
| Ten-m     | 2 | Ten-m_Intragenic (3,83)<br>Ten-m_Intragenic (2,17)                                                 | chr3L:22321211-22321212<br>chr3L:22355731-22355732                                                       | CG5723  | FBgn0004449 |
| CG14459   | 2 | CG14459_Intragenic (2,74)<br>CG14459_Intragenic (2,34)                                             | chr3L:22596511-22596512<br>chr3L:22595021-22595022                                                       | CG14459 | FBgn0037171 |
| Ets65A    | 2 | Ets65A_Intragenic (3,53)<br>Ets65A_Intragenic (1,99)                                               | chr3L:6097781-6097782<br>chr3L:6099191-6099192                                                           | CG7018  | FBgn0005658 |
| CG13894   | 2 | CG13894_Intragenic (2,31)<br>CG13894_Intragenic (2,25)                                             | chr3L:6980111-6980112<br>chr3L:6971911-6971912                                                           | CG13894 | FBgn0035157 |

|                  |   |                                                                             |                                                                               |         |             |
|------------------|---|-----------------------------------------------------------------------------|-------------------------------------------------------------------------------|---------|-------------|
| Hs6st            | 2 | Hs6st Intragenic (2,44)                                                     | chr3R:15831211-15831212                                                       | CG4451  | FBgn0038755 |
| SKIP             | 2 | Hs6st Intragenic (2,06)<br>SKIP Intragenic (4,55)<br>SKIP Intragenic (2,41) | chr3R:15784281-15784282<br>chr3R:18036091-18036092<br>chr3R:18105381-18105382 | CG31163 | FBgn0051163 |
| CG34355          | 2 | CG34355 Intragenic (3,14)<br>CG34355 Intragenic (2,18)                      | chr3R:19655271-19655272<br>chr3R:19660851-19660852                            | CG34355 | FBgn0085384 |
| CG11873          | 2 | CG11873 Intragenic (2,44)<br>CG11873 Intragenic (2,05)                      | chr3R:24894021-24894022<br>chr3R:24910181-24910182                            | CG11873 | FBgn0039633 |
| sima             | 2 | sima Intragenic (6,51)<br>sima Intragenic (2,37)                            | chr3R:25936541-25936542<br>chr3R:25916121-25916122                            | CG45051 | FBgn0266411 |
| Gprk2            | 2 | Gprk2 Intragenic (2,62)<br>Gprk2 Intragenic (1,95)                          | chr3R:27276151-27276152<br>chr3R:27233351-27233352                            | CG17998 | FBgn0261988 |
| Dtg              | 2 | Dtg Intragenic (5,66)<br>Dtg Intragenic (2,03)                              | chr3R:8475231-8475232<br>chr3R:8475591-8475592                                | CG6234  | FBgn0038071 |
| X11Lbeta         | 2 | X11Lbeta Intragenic (4,5)<br>X11Lbeta Intragenic (3,16)                     | chrX:10577271-10577272<br>chrX:10588901-10588902                              | CG32677 | FBgn0052677 |
| Vsx2             | 2 | Vsx2 Intragenic (5,74)<br>Vsx2 Intragenic (4,58)                            | chrX:5435771-5435772<br>chrX:5432761-5432762                                  | CG33980 | FBgn0263512 |
| CG13137          | 1 | CG13137_3' side (2,1)                                                       | chr2L:10176091-10176092                                                       | CG13137 | FBgn0032188 |
| Lrr47            | 1 | Lrr47_3' side (3,51)                                                        | chr2L:10520911-10520912                                                       | CG6098  | FBgn0010398 |
| CG14926          | 1 | CG14926_3' side (3,4)                                                       | chr2L:11337141-11337142                                                       | CG14926 | FBgn0032360 |
| CG15483          | 1 | CG15483_3' side (2,44)                                                      | chr2L:12750611-12750612                                                       | CG15483 | FBgn0032457 |
| CG42680          | 1 | CG42680_3' side (2,47)                                                      | chr2L:14579051-14579052                                                       | CG42680 | FBgn0261566 |
| stc              | 1 | stc_3' side (2,83)                                                          | chr2L:15118551-15118552                                                       | CG3647  | FBgn0001978 |
| wor              | 1 | wor_3' side (4,02)                                                          | chr2L:15412371-15412372                                                       | CG4158  | FBgn0001983 |
| Tim17b2          | 1 | Tim17b2_3' side (2,03)                                                      | chr2L:15490611-15490612                                                       | CG15257 | FBgn0020371 |
| CG31804          | 1 | CG31804_3' side (5,39)                                                      | chr2L:17366331-17366332                                                       | CG31804 | FBgn0051804 |
| CG34007          | 1 | CG34007_3' side (2,44)                                                      | chr2L:20496531-20496532                                                       | CG34007 | FBgn0054007 |
| tsh              | 1 | tsh_3' side (2,78)                                                          | chr2L:21851591-21851592                                                       | CG1374  | FBgn0003866 |
| CG43750          | 1 | CG43750_3' side (3,71)                                                      | chr2L:2388751-2388752                                                         | CG43750 | FBgn0264081 |
| slp2             | 1 | slp2_3' side (4,37)                                                         | chr2L:3846571-3846572                                                         | CG2939  | FBgn0004567 |
| GluRIIB          | 1 | GluRIIB_3' side (2,1)                                                       | chr2L:5565331-5565332                                                         | CG7234  | FBgn0020429 |
| Osm6             | 1 | Osm6_3' side (2,55)                                                         | chr2L:6555351-6555352                                                         | CG9595  | FBgn0031829 |
| hui              | 1 | hui_3' side (3,18)                                                          | chr2R:10701571-10701572                                                       | CG10200 | FBgn0033968 |
| NaPi-T           | 1 | NaPi-T_3' side (2,74)                                                       | chr2R:10729541-10729542                                                       | CG10207 | FBgn0016684 |
| CG8405           | 1 | CG8405_3' side (2,97)                                                       | chr2R:11954991-11954992                                                       | CG8405  | FBgn0034071 |
| Or56a            | 1 | Or56a_3' side (5,7)                                                         | chr2R:15656401-15656402                                                       | CG12501 | FBgn0034473 |
| Sfp60F           | 1 | Sfp60F_3' side (2,19)                                                       | chr2R:21058431-21058432                                                       | CG42478 | FBgn0259968 |
| eve              | 1 | eve_3' side (4,38)                                                          | chr2R:5869441-5869442                                                         | CG2328  | FBgn0000606 |
| CG8298           | 1 | CG8298_3' side (2,15)                                                       | chr2R:7880391-7880392                                                         | CG8298  | FBgn0033673 |
| CG13186          | 1 | CG13186_3' side (2,1)                                                       | chr2R:7970331-7970332                                                         | CG13186 | FBgn0033680 |
| CG13324          | 1 | CG13324_3' side (2,74)                                                      | chr2R:8936231-8936232                                                         | CG13324 | FBgn0033789 |
| CG17048          | 1 | CG17048_3' side (2,41)                                                      | chr2R:9215451-9215452                                                         | CG17048 | FBgn0033828 |
| caup             | 1 | caup_3' side (4,17)                                                         | chr3L:12633131-12633132                                                       | CG10605 | FBgn0015919 |
| CG33262          | 1 | CG33262_3' side (2,65)                                                      | chr3L:13131041-13131042                                                       | CG33262 | FBgn0053262 |
| CG42758          | 1 | CG42758_3' side (5,75)                                                      | chr3L:14562781-14562782                                                       | CG42758 | FBgn0261816 |
| ND-24L           | 1 | ND-24L_3' side (2,96)                                                       | chr3L:17311271-17311272                                                       | CG6485  | FBgn0036706 |
| tap              | 1 | tap_3' side (2,11)                                                          | chr3L:17356351-17356352                                                       | CG7659  | FBgn0015550 |
| CG13891          | 1 | CG13891_3' side (3,15)                                                      | chr3L:429131-429132                                                           | CG13891 | FBgn0035139 |
| CG18586          | 1 | CG18586_3' side (2,96)                                                      | chr3L:5870331-5870332                                                         | CG18586 | FBgn0035642 |
| DNAPol-epsilon58 | 1 | DNAPol-epsilon58_3' side (3,01)                                             | chr3L:5886111-5886112                                                         | CG10489 | FBgn0035644 |
| vvl              | 1 | vvl_3' side (3,45)                                                          | chr3L:6829811-6829812                                                         | CG10037 | FBgn0086680 |
| Prat2            | 1 | Prat2_3' side (3,72)                                                        | chr3L:6878461-6878462                                                         | CG10078 | FBgn0041194 |
| exex             | 1 | exex_3' side (3,95)                                                         | chr3L:7948231-7948232                                                         | CG8254  | FBgn0041156 |
| Abd-B            | 1 | Abd-B_3' side (2,24)                                                        | chr3R:12719251-12719252                                                       | CG11648 | FBgn0000015 |
| slou             | 1 | slou_3' side (4,32)                                                         | chr3R:17371381-17371382                                                       | CG6534  | FBgn0002941 |
| CG42789          | 1 | CG42789_3' side (2)                                                         | chr3R:22602251-22602252                                                       | CG42789 | FBgn0261860 |
| fkh              | 1 | fkh_3' side (2,13)                                                          | chr3R:24399431-24399432                                                       | CG10002 | FBgn0000659 |
| zen              | 1 | zen_3' side (2,55)                                                          | chr3R:2577851-2577852                                                         | CG1046  | FBgn0004053 |
| CecC             | 1 | CecC_3' side (4,15)                                                         | chr3R:26042831-26042832                                                       | CG1373  | FBgn0000279 |
| CG2053           | 1 | CG2053_3' side (2,25)                                                       | chr3R:2786201-2786202                                                         | CG2053  | FBgn0039887 |
| CG14598          | 1 | CG14598_3' side (2,94)                                                      | chr3R:3272431-3272432                                                         | CG14598 | FBgn0037503 |
| CG18249          | 1 | CG18249_3' side (3,1)                                                       | chr3R:4051371-4051372                                                         | CG18249 | FBgn0037553 |
| CG14662          | 1 | CG14662_3' side (2,79)                                                      | chr3R:803981-803982                                                           | CG14662 | FBgn0037291 |
| grsm             | 1 | grsm_3' side (3,02)                                                         | chr3R:8771151-8771152                                                         | CG7340  | FBgn0040493 |
| CG8141           | 1 | CG8141_3' side (2,78)                                                       | chr3R:9026671-9026672                                                         | CG8141  | FBgn0038125 |
| Art9             | 1 | Art9_3' side (5,66)                                                         | chr3R:9756151-9756152                                                         | CG9929  | FBgn0038188 |
| CG9926           | 1 | CG9926_3' side (1,98)                                                       | chr3R:9775571-9775572                                                         | CG9926  | FBgn0038190 |
| CG11448          | 1 | CG11448_3' side (3)                                                         | chrX:1291891-1291892                                                          | CG11448 | FBgn0024985 |
| disco            | 1 | disco_3' side (2,05)                                                        | chrX:16102761-16102762                                                        | CG9908  | FBgn0000459 |
| CG12679          | 1 | CG12679_3' side (5,12)                                                      | chrX:20231811-20231812                                                        | CG12679 | FBgn0031103 |
| CG1324           | 1 | CG1324_3' side (3,53)                                                       | chrX:20594231-20594232                                                        | CG1324  | FBgn0031129 |
| CG6379           | 1 | CG6379_3' side (2,47)                                                       | chrX:3989111-3989112                                                          | CG6379  | FBgn0029693 |
| CG43135          | 1 | CG43135_3' side (3,64)                                                      | chrX:4143611-4143612                                                          | CG43135 | FBgn0262609 |
| CG15577          | 1 | CG15577_3' side (5,39)                                                      | chrX:4168311-4168312                                                          | CG15577 | FBgn0040904 |
| rux              | 1 | rux_3' side (3,88)                                                          | chrX:5926071-5926072                                                          | CG4336  | FBgn0003302 |
| oc               | 1 | oc_3' side (4,07)**                                                         | chrX:8511071-8511072                                                          | CG12154 | FBgn0004102 |
| CG1791           | 1 | CG1791_3' side (2,61)                                                       | chrX:9854911-9854912                                                          | CG1791  | FBgn0030163 |
| Osi21            | 1 | Osi21_5' side (8,39)                                                        | chr2L:11297641-11297642                                                       | CG14925 | FBgn0032359 |
| sala             | 1 | sala_5' side (2,44)                                                         | chr2L:11473331-11473332                                                       | CG4922  | FBgn0003313 |
| robo3            | 1 | robo3_5' side (3,81)                                                        | chr2L:1252221-1252222                                                         | CG5423  | FBgn0041097 |
| CG16800          | 1 | CG16800_5' side (2,41)                                                      | chr2L:12949641-12949642                                                       | CG16800 | FBgn0032462 |
| noc              | 1 | noc_5' side (2,12)                                                          | chr2L:14482821-14482822                                                       | CG4491  | FBgn0005771 |

|                  |   |                                 |                          |         |             |
|------------------|---|---------------------------------|--------------------------|---------|-------------|
| ProtB            | 1 | ProtB_5' side_(2,65)            | chr2L:14898851-14898852  | CG4478  | FBgn0013301 |
| CaBP1            | 1 | CaBP1_5' side_(4,13)            | chr2L:16358211-16358212  | CG5809  | FBgn0025678 |
| ApepP            | 1 | ApepP_5' side_(2,69)            | chr2L:16919431-16919432  | CG6291  | FBgn0026150 |
| aop              | 1 | aop_5' side_(2,01)              | chr2L:2182161-2182162    | CG3166  | FBgn0000097 |
| CG3557           | 1 | CG3557_5' side_(2,1)            | chr2L:2387031-2387032    | CG3557  | FBgn0031423 |
| CG2955           | 1 | CG2955_5' side_(6,24)           | chr2L:4136931-4136932    | CG2955  | FBgn0031585 |
| CG14020          | 1 | CG14020_5' side_(2,32)          | chr2L:5515101-5515102    | CG14020 | FBgn0031707 |
| CG31639          | 1 | CG31639_5' side_(3,51)          | chr2L:6155731-6155732    | CG31639 | FBgn0051639 |
| Ugt37b1          | 1 | Ugt37b1_5' side_(2,51)          | chr2L:6216141-6216142    | CG9481  | FBgn0026755 |
| CG17375          | 1 | CG17375_5' side_(2,51)          | chr2L:6810511-6810512    | CG17375 | FBgn0031861 |
| raw              | 1 | raw_5' side_(6,09)              | chr2L:8746201-8746202    | CG12437 | FBgn0003209 |
| CG12438          | 1 | CG12438_5' side_(3,17)          | chr2L:8746811-8746812    | CG12438 | FBgn0032065 |
| Lsp1beta         | 1 | Lsp1beta_5' side_(2,19)         | chr2L:892871-892872      | CG4178  | FBgn0002563 |
| bib              | 1 | bib_5' side_(3,07)              | chr2L:9981751-9981752    | CG4722  | FBgn0000180 |
| CG12862          | 1 | CG12862_5' side_(3,34)          | chr2R:10528601-10528602  | CG12862 | FBgn0033950 |
| CG30083          | 1 | CG30083_5' side_(3,39)          | chr2R:11604371-11604372  | CG30083 | FBgn0050083 |
| CG17290          | 1 | CG17290_5' side_(3,64)          | chr2R:13040951-13040952  | CG17290 | FBgn0034201 |
| ldgf5            | 1 | ldgf5_5' side_(3,99)            | chr2R:14280601-14280602  | CG5154  | FBgn0064237 |
| CG42306          | 1 | CG42306_5' side_(2,37)          | chr2R:14550971-14550972  | CG42306 | FBgn0259202 |
| Obp56g           | 1 | Obp56g_5' side_(2,95)           | chr2R:15674511-15674512  | CG13873 | FBgn0034474 |
| Obp56h           | 1 | Obp56h_5' side_(2,01)           | chr2R:15690761-15690762  | CG13874 | FBgn0034475 |
| CG13872          | 1 | CG13872_5' side_(2,82)          | chr2R:15777731-15777732  | CG13872 | FBgn0034477 |
| CG12484          | 1 | CG12484_5' side_(4,73)          | chr2R:16301171-16301172  | CG12484 | FBgn0086604 |
| HmgZ             | 1 | HmgZ_5' side_(2,24)             | chr2R:17594791-17594792  | CG17921 | FBgn0010228 |
| CG10384          | 1 | CG10384_5' side_(2,94)          | chr2R:18349101-18349102  | CG10384 | FBgn0034731 |
| CG3092           | 1 | CG3092_5' side_(3,35)           | chr2R:19115011-19115012  | CG3092  | FBgn0034835 |
| nvx              | 1 | nvx_5' side_(2,55)              | chr2R:20162491-20162492  | CG3385  | FBgn0005636 |
| CG30430          | 1 | CG30430_5' side_(3,56)          | chr2R:21007291-21007292  | CG30430 | FBgn0050430 |
| SdhB             | 1 | SdhB_5' side_(4,1)              | chr2R:2693151-2693152    | CG3283  | FBgn0014028 |
| stmA             | 1 | stmA_5' side_(2,03)             | chr2R:4621901-4621902    | CG8739  | FBgn0086784 |
| sns              | 1 | sns_5' side_(3,21)              | chr2R:4684751-4684752    | CG33141 | FBgn0024189 |
| Hdc              | 1 | Hdc_5' side_(3,84)              | chr2R:6126571-6126572    | CG3454  | FBgn0005619 |
| Cyp12d1-d        | 1 | Cyp12d1-d_5' side_(2,66)        | chr2R:7017791-7017792    | CG33503 | FBgn0053503 |
| TpnC47D          | 1 | TpnC47D_5' side_(2,87)          | chr2R:7162831-7162832    | CG9073  | FBgn0010423 |
| wuc              | 1 | wuc_5' side_(2,52)              | chr2R:8586911-8586912    | CG12442 | FBgn0033770 |
| CG42663          | 1 | CG42663_5' side_(2,48)*         | chr2R:8589511-8589512    | CG42663 | FBgn0261545 |
| CG41242          | 1 | CG41242_5' side_(1,98)          | chr2RHET:2158471-2158472 | CG41242 | FBgn0085569 |
| CG12523          | 1 | CG12523_5' side_(2,82)          | chr3L:10790891-10790892  | CG12523 | FBgn0036102 |
| CG32105          | 1 | CG32105_5' side_(2,14)          | chr3L:12315161-12315162  | CG32105 | FBgn0052105 |
| caps             | 1 | caps_5' side_(3,5)              | chr3L:13203031-13203032  | CG11282 | FBgn0023095 |
| comm             | 1 | comm_5' side_(2,24)             | chr3L:15755581-15755582  | CG17943 | FBgn0010105 |
| CG42852          | 1 | CG42852_5' side_(3,29)          | chr3L:16741881-16741882  | CG42852 | FBgn0262099 |
| grim             | 1 | grim_5' side_(2,15)             | chr3L:18316161-18316162  | CG4345  | FBgn0015946 |
| CG43407          | 1 | CG43407_5' side_(2,44)          | chr3L:19050671-19050672  | CG43407 | FBgn0263326 |
| CG43312          | 1 | CG43312_5' side_(2,71)          | chr3L:22486031-22486032  | CG43312 | FBgn0263004 |
| CG14985          | 1 | CG14985_5' side_(3,38)          | chr3L:4000371-4000372    | CG14985 | FBgn0035482 |
| CG10479          | 1 | CG10479_5' side_(2,03)*         | chr3L:5981271-5981272    | CG10479 | FBgn0035656 |
| CG13293          | 1 | CG13293_5' side_(5,83)          | chr3L:6075811-6075812    | CG13293 | FBgn0035677 |
| CG7546           | 1 | CG7546_5' side_(2,25)           | chr3L:7503391-7503392    | CG7546  | FBgn0035793 |
| hng3             | 1 | hng3_5' side_(2,35)             | chr3L:776971-776972      | CG13897 | FBgn0035160 |
| bip1             | 1 | bip1_5' side_(2,72)             | chr3L:8053031-8053032    | CG7574  | FBgn0026263 |
| CG13678          | 1 | CG13678_5' side_(3,3)           | chr3L:8213711-8213712    | CG13678 | FBgn0035859 |
| CG5194           | 1 | CG5194_5' side_(3,34)           | chr3L:9004911-9004912    | CG5194  | FBgn0035955 |
| nerfin-1         | 1 | nerfin-1_5' side_(5,59)         | chr3L:907761-907762      | CG13906 | FBgn0028999 |
| AOX4             | 1 | AOX4_5' side_(2,66)             | chr3R:11386051-11386052  | CG18516 | FBgn0038350 |
| pnr              | 1 | pnr_5' side_(3,35)              | chr3R:11851551-11851552  | CG3978  | FBgn0003117 |
| Glut3            | 1 | Glut3_5' side_(2,37)            | chr3R:12606731-12606732  | CG3853  | FBgn0015230 |
| CG7587           | 1 | CG7587_5' side_(1,97)           | chr3R:13415591-13415592  | CG7587  | FBgn0038523 |
| gl               | 1 | gl_5' side_(2,55)               | chr3R:14202611-14202612  | CG7672  | FBgn0004618 |
| cas              | 1 | cas_5' side_(2,2)               | chr3R:1548911-1548912    | CG2102  | FBgn0004878 |
| Rh3              | 1 | Rh3_5' side_(2,7)               | chr3R:15910051-15910052  | CG10888 | FBgn0003249 |
| CG11373          | 1 | CG11373_5' side_(2,02)          | chr3R:1788711-1788712    | CG11373 | FBgn0040679 |
| CG11459          | 1 | CG11459_5' side_(3,13)          | chr3R:1857471-1857472    | CG11459 | FBgn0037396 |
| E(spl)malpha-BFM | 1 | E(spl)malpha-BFM_5' side_(2,67) | chr3R:21835771-21835772  | CG8337  | FBgn0002732 |
| CG31324          | 1 | CG31324_5' side_(3,32)          | chr3R:21932091-21932092  | CG31324 | FBgn0051324 |
| TI               | 1 | TI_5' side_(4)                  | chr3R:22623611-22623612  | CG5490  | FBgn0262473 |
| unc80            | 1 | unc80_5' side_(2,34)            | chr3R:23487411-23487412  | CG18437 | FBgn0039536 |
| CG34354          | 1 | CG34354_5' side_(2,75)          | chr3R:23934791-23934792  | CG34354 | FBgn0085383 |
| Dr               | 1 | Dr_5' side_(3,53)               | chr3R:25378681-25378682  | CG1897  | FBgn0000492 |
| Ama              | 1 | Ama_5' side_(2,53)              | chr3R:2587401-2587402    | CG2198  | FBgn0000071 |
| CG1340           | 1 | CG1340_5' side_(3,15)           | chr3R:26544151-26544152  | CG1340  | FBgn0039797 |
| CG11741          | 1 | CG11741_5' side_(2,18)          | chr3R:4354971-4354972    | CG11741 | FBgn0040531 |
| beat-Va          | 1 | beat-Va_5' side_(2,13)          | chr3R:8674371-8674372    | CG10134 | FBgn0038087 |
| CG43131          | 1 | CG43131_5' side_(3,77)          | chr3R:939431-939432      | CG43131 | FBgn0262605 |
| ems              | 1 | ems_5' side_(2,52)              | chr3R:9723431-9723432    | CG2988  | FBgn0000576 |
| dpr16            | 1 | dpr16_5' side_(4,72)            | chr3R:976391-976392      | CG12591 | FBgn0037295 |

|              |   |                                |                         |         |             |
|--------------|---|--------------------------------|-------------------------|---------|-------------|
| fd102C       | 1 | fd102C_5' side_(2,51)          | chr4:871071-871072      | CG11152 | FBgn0039937 |
| CG42300      | 1 | CG42300_5' side_(2,21)         | chrX:15454071-15454072  | CG42300 | FBgn0259196 |
| unc-4        | 1 | unc-4_5' side_(2,32)           | chrX:17651841-17651842  | CG6269  | FBgn0024184 |
| CG7423       | 1 | CG7423_5' side_(3,82)          | chrX:18981811-18981812  | CG7423  | FBgn0030982 |
| CG12688      | 1 | CG12688_5' side_(4,76)         | chrX:4270381-4270382    | CG12688 | FBgn0029707 |
| CG42749      | 1 | CG42749_5' side_(3,61)         | chrX:5163591-5163592    | CG42749 | FBgn0261803 |
| CG1958       | 1 | CG1958_5' side_(2,08)          | chrX:7150701-7150702    | CG1958  | FBgn0029940 |
| CG1402       | 1 | CG1402_5' side_(4,23)          | chrX:7702311-7702312    | CG1402  | FBgn0029962 |
| CG7065       | 1 | CG7065_5' side_(5,14)          | chrX:9035651-9035652    | CG7065  | FBgn0030091 |
| bsk          | 1 | bsk_Intragenic_(2,18)          | chr2L:10249431-10249432 | CG5680  | FBgn0000229 |
| CG34367      | 1 | CG34367_Intragenic_(4,57)      | chr2L:10349751-10349752 | CG34367 | FBgn0085396 |
| Myo31DF      | 1 | Myo31DF_Intragenic_(2,27)      | chr2L:10503591-10503592 | CG7438  | FBgn0086347 |
| Pde1c        | 1 | Pde1c_Intragenic_(2,65)        | chr2L:11895151-11895152 | CG44007 | FBgn0264815 |
| bun          | 1 | bun_Intragenic_(3)             | chr2L:12529681-12529682 | CG42281 | FBgn0259176 |
| kuz          | 1 | kuz_Intragenic_(2,96)          | chr2L:13576411-13576412 | CG7147  | FBgn0259984 |
| cenG1A       | 1 | cenG1A_Intragenic_(4,6)        | chr2L:13877171-13877172 | CG31811 | FBgn0028509 |
| osp          | 1 | osp_Intragenic_(2,59)          | chr2L:14683811-14683812 | CG3479  | FBgn003016  |
| crp          | 1 | crp_Intragenic_(1,94)          | chr2L:16275391-16275392 | CG7664  | FBgn0001994 |
| CG42389      | 1 | CG42389_Intragenic_(1,96)      | chr2L:16647531-16647532 | CG42389 | FBgn0259735 |
| beat-IIIa    | 1 | beat-IIIa_Intragenic_(2,07)    | chr2L:17163991-17163992 | CG12621 | FBgn0265607 |
| beat-IIIc    | 1 | beat-IIIc_Intragenic_(2,66)    | chr2L:17221181-17221182 | CG15138 | FBgn0032629 |
| Dhc36C       | 1 | Dhc36C_Intragenic_(4,17)       | chr2L:17514751-17514752 | CG5526  | FBgn0013810 |
| kon          | 1 | kon_Intragenic_(3,38)          | chr2L:18498891-18498892 | CG10275 | FBgn0032683 |
| ssp3         | 1 | ssp3_Intragenic_(4,14)         | chr2L:18925451-18925452 | CG18397 | FBgn0032723 |
| brat         | 1 | brat_Intragenic_(2,38)         | chr2L:19167641-19167642 | CG10719 | FBgn0010300 |
| dnt          | 1 | dnt_Intragenic_(2,38)          | chr2L:19341711-19341712 | CG17559 | FBgn0024245 |
| erm          | 1 | erm_Intragenic_(4,85)          | chr2L:1959431-1959432   | CG31670 | FBgn0031375 |
| cad          | 1 | cad_Intragenic_(3,07)          | chr2L:20778501-20778502 | CG1759  | FBgn0000251 |
| CG9328       | 1 | CG9328_Intragenic_(7,85)       | chr2L:20800351-20800352 | CG9328  | FBgn0032886 |
| CG3645       | 1 | CG3645_Intragenic_(4,46)       | chr2L:268371-268372     | CG3645  | FBgn0031238 |
| Plc21C       | 1 | Plc21C_Intragenic_(2,48)       | chr2L:306591-306592     | CG4574  | FBgn0004611 |
| toc          | 1 | toc_Intragenic_(1,96)          | chr2L:3117091-3117092   | CG9660  | FBgn0015600 |
| fred         | 1 | fred_Intragenic_(2,38)         | chr2L:3939351-3939352   | CG31774 | FBgn0051774 |
| tkv          | 1 | tkv_Intragenic_(4,24)          | chr2L:5245591-5245592   | CG14026 | FBgn0003716 |
| ush          | 1 | ush_Intragenic_(2,52)          | chr2L:526161-526162     | CG2762  | FBgn0003963 |
| DIP-eta      | 1 | DIP-eta_Intragenic_(2,58)      | chr2L:5612131-5612132   | CG14010 | FBgn0031725 |
| Gsc          | 1 | Gsc_Intragenic_(4,29)          | chr2L:589251-589252     | CG2851  | FBgn0010323 |
| stai         | 1 | stai_Intragenic_(2,5)          | chr2L:6104401-6104402   | CG31641 | FBgn0266521 |
| PDZ-GEF      | 1 | PDZ-GEF_Intragenic_(3,17)      | chr2L:6324531-6324532   | CG9491  | FBgn0265778 |
| sens-2       | 1 | sens-2_Intragenic_(2,17)       | chr2L:6828741-6828742   | CG31632 | FBgn0051632 |
| Wnt4         | 1 | Wnt4_Intragenic_(3,04)         | chr2L:7272801-7272802   | CG4698  | FBgn0010453 |
| CG14535      | 1 | CG14535_Intragenic_(5,06)      | chr2L:7850661-7850662   | CG14535 | FBgn0031955 |
| fu12         | 1 | fu12_Intragenic_(2,65)         | chr2L:8463491-8463492   | CG17608 | FBgn0026718 |
| Sema-1a      | 1 | Sema-1a_Intragenic_(2,37)      | chr2L:8578571-8578572   | CG18405 | FBgn0011259 |
| numb         | 1 | numb_Intragenic_(3,72)         | chr2L:9443381-9443382   | CG3779  | FBgn0002973 |
| Shroom       | 1 | Shroom_Intragenic_(3,54)       | chr2R:10221881-10221882 | CG34379 | FBgn0085408 |
| L            | 1 | L_Intragenic_(1,97)            | chr2R:10369501-10369502 | -       | FBgn0267825 |
| mspo         | 1 | mspo_Intragenic_(2,85)         | chr2R:10592791-10592792 | CG10145 | FBgn0020269 |
| Hr51         | 1 | Hr51_Intragenic_(2,79)         | chr2R:11222291-11222292 | CG16801 | FBgn0034012 |
| ns2          | 1 | ns2_Intragenic_(2,85)          | chr2R:13455731-13455732 | CG6501  | FBgn0034243 |
| sm           | 1 | sm_Intragenic_(2,3)            | chr2R:15447831-15447832 | CG9218  | FBgn0003435 |
| Fili         | 1 | Fili_Intragenic_(4,84)         | chr2R:17779111-17779112 | CG34368 | FBgn0085397 |
| Liprin-gamma | 1 | Liprin-gamma_Intragenic_(2,38) | chr2R:18252791-18252792 | CG11206 | FBgn0034720 |
| uzip         | 1 | uzip_Intragenic_(3,79)         | chr2R:20900551-20900552 | CG3533  | FBgn0004055 |
| esn          | 1 | esn_Intragenic_(2,84)          | chr2R:2985051-2985052   | CG43722 | FBgn0263934 |
| so           | 1 | so_Intragenic_(5,32)           | chr2R:3320731-3320732   | CG11121 | FBgn0003460 |
| CG1399       | 1 | CG1399_Intragenic_(3,3)        | chr2R:3585351-3585352   | CG1399  | FBgn0033212 |
| LRP1         | 1 | LRP1_Intragenic_(4,7)          | chr2R:4082651-4082652   | CG33087 | FBgn0053087 |
| pdm3         | 1 | pdm3_Intragenic_(3,62)         | chr2R:4270831-4270832   | CG42698 | FBgn0261588 |
| Cyp4ad1      | 1 | Cyp4ad1_Intragenic_(2,03)      | chr2R:4329811-4329812   | CG2110  | FBgn0033292 |
| CAP          | 1 | CAP_Intragenic_(7,08)          | chr2R:6157291-6157292   | CG18408 | FBgn0033504 |
| inv          | 1 | inv_Intragenic_(5,67)          | chr2R:7365531-7365532   | CG17835 | FBgn0001269 |
| Psc          | 1 | Psc_Intragenic_(2,44)          | chr2R:8861251-8861252   | CG3886  | FBgn0005624 |
| Dri-2        | 1 | Dri-2_Intragenic_(3,18)        | chr2R:8954951-8954952   | CG3915  | FBgn0033791 |
| Ack-like     | 1 | Ack-like_Intragenic_(2,25)     | chr2R:9039071-9039072   | CG43741 | FBgn0263998 |
| arr          | 1 | arr_Intragenic_(2,47)          | chr2R:9362251-9362252   | CG5912  | FBgn0000119 |
| Vmat         | 1 | Vmat_Intragenic_(2,28)         | chr2R:9415231-9415232   | CG33528 | FBgn0260964 |
| mam          | 1 | mam_Intragenic_(2,21)          | chr2R:9915851-9915852   | CG8118  | FBgn0002643 |
| dpr6         | 1 | dpr6_Intragenic_(2,09)         | chr3L:10001831-10001832 | CG14162 | FBgn0040823 |
| simj         | 1 | simj_Intragenic_(1,96)         | chr3L:10676471-10676472 | CG32067 | FBgn0010762 |
| CG32085      | 1 | CG32085_Intragenic_(2,78)      | chr3L:11664881-11664882 | CG32085 | FBgn0052085 |
| CG11658      | 1 | CG11658_Intragenic_(2,82)      | chr3L:11701611-11701612 | CG11658 | FBgn0036196 |
| Nrx-IV       | 1 | Nrx-IV_Intragenic_(4,11)       | chr3L:12140461-12140462 | CG6827  | FBgn0013997 |
| sowah        | 1 | sowah_Intragenic_(2,41)        | chr3L:12556111-12556112 | CG10632 | FBgn0036302 |
| Ptp61F       | 1 | Ptp61F_Intragenic_(2,75)       | chr3L:1390451-1390452   | CG9181  | FBgn0267487 |
| Sox21b       | 1 | Sox21b_Intragenic_(2,59)       | chr3L:14107611-14107612 | CG32139 | FBgn0042630 |

|               |   |                                 |                         |         |             |
|---------------|---|---------------------------------|-------------------------|---------|-------------|
| HGTX          | 1 | HGTX_Intragenic_(3,71)          | chr3L:14584521-14584522 | CG13475 | FBgn0040318 |
| mnd           | 1 | mnd_Intragenic_(2,12)           | chr3L:14981271-14981272 | CG3297  | FBgn0002778 |
| Abl           | 1 | Abl_Intragenic_(2,48)           | chr3L:16634421-16634422 | CG4032  | FBgn0000017 |
| CG9701        | 1 | CG9701_Intragenic_(2,67)        | chr3L:16731841-16731842 | CG9701  | FBgn0036659 |
| Nrt           | 1 | Nrt_Intragenic_(2,61)           | chr3L:16763851-16763852 | CG9704  | FBgn0004108 |
| Rbp6          | 1 | Rbp6_Intragenic_(2,44)          | chr3L:17106671-17106672 | CG32169 | FBgn0260943 |
| nkd           | 1 | nkd_Intragenic_(2,11)           | chr3L:19018931-19018932 | CG11614 | FBgn0002945 |
| Dbx           | 1 | Dbx_Intragenic_(2,29)           | chr3L:1931511-1931512   | CG42234 | FBgn0261723 |
| CG42674       | 1 | CG42674_Intragenic_(2,24)       | chr3L:20159671-20159672 | CG42674 | FBgn0261556 |
| gogo          | 1 | gogo_Intragenic_(2,41)          | chr3L:20270111-20270112 | CG32227 | FBgn0052227 |
| CG10508       | 1 | CG10508_Intragenic_(3,59)       | chr3L:21204931-21204932 | CG10508 | FBgn0037060 |
| Mrtf          | 1 | Mrtf_Intragenic_(2,57)          | chr3L:2745211-2745212   | CG32296 | FBgn0052296 |
| Tet           | 1 | Tet_Intragenic_(2,97)           | chr3L:2809691-2809692   | CG43444 | FBgn0263392 |
| Eip63E        | 1 | Eip63E_Intragenic_(2,88)        | chr3L:3544051-3544052   | CG10579 | FBgn0005640 |
| trh           | 1 | trh_Intragenic_(2,37)           | chr3L:378311-378312     | CG42865 | FBgn0262139 |
| Gad1          | 1 | Gad1_Intragenic_(3,96)          | chr3L:4077171-4077172   | CG14994 | FBgn0004516 |
| CG14989       | 1 | CG14989_Intragenic_(5,7)        | chr3L:4088911-4088912   | CG14989 | FBgn0035495 |
| Cip4          | 1 | Cip4_Intragenic_(2,14)          | chr3L:4357151-4357152   | CG15015 | FBgn0035533 |
| Src64B        | 1 | Src64B_Intragenic_(2,44)        | chr3L:4617321-4617322   | CG7524  | FBgn0262733 |
| Con           | 1 | Con_Intragenic_(2,03)           | chr3L:4987131-4987132   | CG7503  | FBgn0005775 |
| Cyt-c1        | 1 | Cyt-c1_Intragenic_(2,02)        | chr3L:5353951-5353952   | CG4769  | FBgn0035600 |
| vn            | 1 | vn_Intragenic_(2,77)            | chr3L:5831521-5831522   | CG10491 | FBgn0003984 |
| CG33275       | 1 | CG33275_Intragenic_(2,77)       | chr3L:7627871-7627872   | CG33275 | FBgn0035802 |
| CG32369       | 1 | CG32369_Intragenic_(2,58)       | chr3L:7796831-7796832   | CG32369 | FBgn0052369 |
| Gug           | 1 | Gug_Intragenic_(2,31)           | chr3L:8453671-8453672   | CG6964  | FBgn0010825 |
| dally         | 1 | dally_Intragenic_(2,77)         | chr3L:8847871-8847872   | CG4974  | FBgn0263930 |
| CG6767        | 1 | CG6767_Intragenic_(3,51)        | chr3L:9687751-9687752   | CG6767  | FBgn0036030 |
| cno           | 1 | cno_Intragenic_(2,07)           | chr3R:1014761-1014762   | CG42312 | FBgn0259212 |
| SF2           | 1 | SF2_Intragenic_(2,18)           | chr3R:12167691-12167692 | CG6987  | FBgn0040284 |
| Fas1          | 1 | Fas1_Intragenic_(8,84)          | chr3R:12455681-12455682 | CG6588  | FBgn0262742 |
| osa           | 1 | osa_Intragenic_(2,31)           | chr3R:13537331-13537332 | CG7467  | FBgn0261885 |
| Ssdp          | 1 | Ssdp_Intragenic_(2,24)          | chr3R:14021851-14021852 | CG7187  | FBgn0011481 |
| 14-3-3epsilon | 1 | 14-3-3epsilon_Intragenic_(3,16) | chr3R:14071471-14071472 | CG31196 | FBgn0020238 |
| Cha           | 1 | Cha_Intragenic_(3,3)            | chr3R:14550651-14550652 | CG12345 | FBgn0000303 |
| gukh          | 1 | gukh_Intragenic_(2,61)          | chr3R:14821951-14821952 | CG31043 | FBgn0026239 |
| cdi           | 1 | cdi_Intragenic_(2,5)            | chr3R:14906791-14906792 | CG6027  | FBgn0004876 |
| DI            | 1 | DI_Intragenic_(6,94)            | chr3R:15145131-15145132 | CG3619  | FBgn0000463 |
| Dys           | 1 | Dys_Intragenic_(2,2)            | chr3R:15311871-15311872 | CG34157 | FBgn0260003 |
| CG2082        | 1 | CG2082_Intragenic_(2,32)        | chr3R:1599601-1599602   | CG2082  | FBgn0027608 |
| Calx          | 1 | Calx_Intragenic_(2,57)          | chr3R:16821991-16821992 | CG5685  | FBgn0013995 |
| Rm62          | 1 | Rm62_Intragenic_(2,35)          | chr3R:1832551-1832552   | CG10279 | FBgn0003261 |
| wge           | 1 | wge_Intragenic_(7,87)           | chr3R:18545291-18545292 | CG31151 | FBgn0051151 |
| cnc           | 1 | cnc_Intragenic_(8,03)           | chr3R:19037651-19037652 | CG43286 | FBgn0262975 |
| pnt           | 1 | pnt_Intragenic_(2,38)           | chr3R:19164291-19164292 | CG17077 | FBgn0003118 |
| CG4393        | 1 | CG4393_Intragenic_(1,96)        | chr3R:19209671-19209672 | CG4393  | FBgn0039075 |
| tnc           | 1 | tnc_Intragenic_(4,36)           | chr3R:20826131-20826132 | CG13648 | FBgn0039257 |
| Fur1          | 1 | Fur1_Intragenic_(4,16)          | chr3R:21189711-21189712 | CG10772 | FBgn0004509 |
| gpp           | 1 | gpp_Intragenic_(3,59)           | chr3R:2253691-2253692   | CG42803 | FBgn0264495 |
| Tusp          | 1 | Tusp_Intragenic_(2,17)          | chr3R:23442561-23442562 | CG5586  | FBgn0039530 |
| CG34353       | 1 | CG34353_Intragenic_(2,26)       | chr3R:23662061-23662062 | CG34353 | FBgn0085382 |
| CG34362       | 1 | CG34362_Intragenic_(5,56)       | chr3R:23887651-23887652 | CG34362 | FBgn0085391 |
| CG11898       | 1 | CG11898_Intragenic_(1,98)       | chr3R:24995231-24995232 | CG11898 | FBgn0039645 |
| pb            | 1 | pb_Intragenic_(2,65)            | chr3R:2561951-2561952   | CG31481 | FBgn0051481 |
| Dfd           | 1 | Dfd_Intragenic_(2,07)           | chr3R:2624911-2624912   | CG2189  | FBgn0000439 |
| zfh1          | 1 | zfh1_Intragenic_(4,02)          | chr3R:26603991-26603992 | CG1322  | FBgn0004606 |
| wts           | 1 | wts_Intragenic_(4,14)           | chr3R:26629031-26629032 | CG12072 | FBgn0011739 |
| cindr         | 1 | cindr_Intragenic_(2,67)         | chr3R:26643031-26643032 | CG31012 | FBgn0027598 |
| CG34347       | 1 | CG34347_Intragenic_(2,64)       | chr3R:27176451-27176452 | CG34347 | FBgn0085376 |
| Poxm          | 1 | Poxm_Intragenic_(3,08)          | chr3R:4156681-4156682   | CG9610  | FBgn0003129 |
| CG34114       | 1 | CG34114_Intragenic_(2,18)       | chr3R:6857651-6857652   | CG34114 | FBgn0083950 |
| pros          | 1 | pros_Intragenic_(3,26)          | chr3R:7198641-7198642   | CG17228 | FBgn0004595 |
| Jupiter       | 1 | Jupiter_Intragenic_(2,35)       | chr3R:7441281-7441282   | CG31363 | FBgn0051363 |
| beat-Vc       | 1 | beat-Vc_Intragenic_(2,24)       | chr3R:8581931-8581932   | CG14390 | FBgn0038084 |
| sim           | 1 | sim_Intragenic_(2,08)           | chr3R:8891111-8891112   | CG7771  | FBgn0004666 |
| corto         | 1 | corto_Intragenic_(2,42)         | chr3R:908511-908512     | CG2530  | FBgn0010313 |
| sv            | 1 | sv_Intragenic_(5,31)            | chr4:1125481-1125482    | CG11049 | FBgn0005561 |
| fuss          | 1 | fuss_Intragenic_(2,38)          | chr4:994311-994312      | CG11093 | FBgn0039932 |
| klh10         | 1 | klh10_Intragenic_(2,15)         | chrU:1932421-1932422    | CG12423 | FBgn0040038 |
| CG45781       | 1 | CG45781_Intragenic_(2,16)       | chrU:80571-80572        | CG45781 | FBgn0267428 |
| Tis11         | 1 | Tis11_Intragenic_(2,51)         | chrX:12562711-12562712  | CG4070  | FBgn0011837 |
| Smr           | 1 | Smr_Intragenic_(9,38)           | chrX:12630311-12630312  | CG4013  | FBgn0265523 |
| NetB          | 1 | NetB_Intragenic_(2,87)          | chrX:14619161-14619162  | CG10521 | FBgn0015774 |
| acj6          | 1 | acj6_Intragenic_(3,56)          | chrX:15259171-15259172  | CG9151  | FBgn0000028 |
| Sep4          | 1 | Sep4_Intragenic_(10,58)         | chrX:16583781-16583782  | CG9699  | FBgn0259923 |
| Bx            | 1 | Bx_Intragenic_(2,44)            | chrX:18442611-18442612  | CG44425 | FBgn0265598 |
| Rip11         | 1 | Rip11_Intragenic_(3,03)         | chrX:18537151-18537152  | CG6606  | FBgn0027335 |

|                            |   |                                              |                         |                 |                                                                                                                                                                                                                                                                                                                                                                                                                                                                                                                                                                                                                                                                                                                                                                                                                                                                                                                                                                                                                                                                                                                                                                                                                                                                                                                                                                                                                                                                                                                                                                                                                                                                                                                                                                                                                                                                                                                                                                                                                                                                                                                                                                                                                                                                                                                                                                                                                                                                                                                                                                                                                                                                                                                                                                                                                                                                                                                                                                                                                                                                                                                                                                                                                                                                                                                                                                                                                                                                                                                                                                                                                                                                                                                                                                                                                                                                                                                                                                                                                                                                  |
|----------------------------|---|----------------------------------------------|-------------------------|-----------------|------------------------------------------------------------------------------------------------------------------------------------------------------------------------------------------------------------------------------------------------------------------------------------------------------------------------------------------------------------------------------------------------------------------------------------------------------------------------------------------------------------------------------------------------------------------------------------------------------------------------------------------------------------------------------------------------------------------------------------------------------------------------------------------------------------------------------------------------------------------------------------------------------------------------------------------------------------------------------------------------------------------------------------------------------------------------------------------------------------------------------------------------------------------------------------------------------------------------------------------------------------------------------------------------------------------------------------------------------------------------------------------------------------------------------------------------------------------------------------------------------------------------------------------------------------------------------------------------------------------------------------------------------------------------------------------------------------------------------------------------------------------------------------------------------------------------------------------------------------------------------------------------------------------------------------------------------------------------------------------------------------------------------------------------------------------------------------------------------------------------------------------------------------------------------------------------------------------------------------------------------------------------------------------------------------------------------------------------------------------------------------------------------------------------------------------------------------------------------------------------------------------------------------------------------------------------------------------------------------------------------------------------------------------------------------------------------------------------------------------------------------------------------------------------------------------------------------------------------------------------------------------------------------------------------------------------------------------------------------------------------------------------------------------------------------------------------------------------------------------------------------------------------------------------------------------------------------------------------------------------------------------------------------------------------------------------------------------------------------------------------------------------------------------------------------------------------------------------------------------------------------------------------------------------------------------------------------------------------------------------------------------------------------------------------------------------------------------------------------------------------------------------------------------------------------------------------------------------------------------------------------------------------------------------------------------------------------------------------------------------------------------------------------------------------------------|
| kek5                       | 1 | kek5_Intragenic_(2,38)                       | chrX:19266171-19266172  | CG12199         | FBgn0031016                                                                                                                                                                                                                                                                                                                                                                                                                                                                                                                                                                                                                                                                                                                                                                                                                                                                                                                                                                                                                                                                                                                                                                                                                                                                                                                                                                                                                                                                                                                                                                                                                                                                                                                                                                                                                                                                                                                                                                                                                                                                                                                                                                                                                                                                                                                                                                                                                                                                                                                                                                                                                                                                                                                                                                                                                                                                                                                                                                                                                                                                                                                                                                                                                                                                                                                                                                                                                                                                                                                                                                                                                                                                                                                                                                                                                                                                                                                                                                                                                                                      |
| RhoGAP19D                  | 1 | RhoGAP19D_Intragenic_(4,51)                  | chrX:20370331-20370332  | CG1412          | FBgn0031118                                                                                                                                                                                                                                                                                                                                                                                                                                                                                                                                                                                                                                                                                                                                                                                                                                                                                                                                                                                                                                                                                                                                                                                                                                                                                                                                                                                                                                                                                                                                                                                                                                                                                                                                                                                                                                                                                                                                                                                                                                                                                                                                                                                                                                                                                                                                                                                                                                                                                                                                                                                                                                                                                                                                                                                                                                                                                                                                                                                                                                                                                                                                                                                                                                                                                                                                                                                                                                                                                                                                                                                                                                                                                                                                                                                                                                                                                                                                                                                                                                                      |
| phl                        | 1 | phl_Intragenic_(6,51)                        | chrX:2215111-2215112    | CG2845          | FBgn0003079                                                                                                                                                                                                                                                                                                                                                                                                                                                                                                                                                                                                                                                                                                                                                                                                                                                                                                                                                                                                                                                                                                                                                                                                                                                                                                                                                                                                                                                                                                                                                                                                                                                                                                                                                                                                                                                                                                                                                                                                                                                                                                                                                                                                                                                                                                                                                                                                                                                                                                                                                                                                                                                                                                                                                                                                                                                                                                                                                                                                                                                                                                                                                                                                                                                                                                                                                                                                                                                                                                                                                                                                                                                                                                                                                                                                                                                                                                                                                                                                                                                      |
| dnc                        | 1 | dnc_Intragenic_(3,41)                        | chrX:3103351-3103352    | CG32498         | FBgn0000479                                                                                                                                                                                                                                                                                                                                                                                                                                                                                                                                                                                                                                                                                                                                                                                                                                                                                                                                                                                                                                                                                                                                                                                                                                                                                                                                                                                                                                                                                                                                                                                                                                                                                                                                                                                                                                                                                                                                                                                                                                                                                                                                                                                                                                                                                                                                                                                                                                                                                                                                                                                                                                                                                                                                                                                                                                                                                                                                                                                                                                                                                                                                                                                                                                                                                                                                                                                                                                                                                                                                                                                                                                                                                                                                                                                                                                                                                                                                                                                                                                                      |
| CG4293                     | 1 | CG4293_Intragenic_(3,1)                      | chrX:424211-424212      | CG4293          | FBgn0024983                                                                                                                                                                                                                                                                                                                                                                                                                                                                                                                                                                                                                                                                                                                                                                                                                                                                                                                                                                                                                                                                                                                                                                                                                                                                                                                                                                                                                                                                                                                                                                                                                                                                                                                                                                                                                                                                                                                                                                                                                                                                                                                                                                                                                                                                                                                                                                                                                                                                                                                                                                                                                                                                                                                                                                                                                                                                                                                                                                                                                                                                                                                                                                                                                                                                                                                                                                                                                                                                                                                                                                                                                                                                                                                                                                                                                                                                                                                                                                                                                                                      |
| CG3062                     | 1 | CG3062_Intragenic_(3,64)                     | chrX:4537551-4537552    | CG3062          | FBgn0025612                                                                                                                                                                                                                                                                                                                                                                                                                                                                                                                                                                                                                                                                                                                                                                                                                                                                                                                                                                                                                                                                                                                                                                                                                                                                                                                                                                                                                                                                                                                                                                                                                                                                                                                                                                                                                                                                                                                                                                                                                                                                                                                                                                                                                                                                                                                                                                                                                                                                                                                                                                                                                                                                                                                                                                                                                                                                                                                                                                                                                                                                                                                                                                                                                                                                                                                                                                                                                                                                                                                                                                                                                                                                                                                                                                                                                                                                                                                                                                                                                                                      |
| CG2861                     | 1 | CG2861_Intragenic_(2,89)                     | chrX:4692171-4692172    | CG2861          | FBgn0029728                                                                                                                                                                                                                                                                                                                                                                                                                                                                                                                                                                                                                                                                                                                                                                                                                                                                                                                                                                                                                                                                                                                                                                                                                                                                                                                                                                                                                                                                                                                                                                                                                                                                                                                                                                                                                                                                                                                                                                                                                                                                                                                                                                                                                                                                                                                                                                                                                                                                                                                                                                                                                                                                                                                                                                                                                                                                                                                                                                                                                                                                                                                                                                                                                                                                                                                                                                                                                                                                                                                                                                                                                                                                                                                                                                                                                                                                                                                                                                                                                                                      |
| Vsx1                       | 1 | Vsx1_Intragenic_(3,62)                       | chrX:5504511-5504512    | CG4136          | FBgn0263511                                                                                                                                                                                                                                                                                                                                                                                                                                                                                                                                                                                                                                                                                                                                                                                                                                                                                                                                                                                                                                                                                                                                                                                                                                                                                                                                                                                                                                                                                                                                                                                                                                                                                                                                                                                                                                                                                                                                                                                                                                                                                                                                                                                                                                                                                                                                                                                                                                                                                                                                                                                                                                                                                                                                                                                                                                                                                                                                                                                                                                                                                                                                                                                                                                                                                                                                                                                                                                                                                                                                                                                                                                                                                                                                                                                                                                                                                                                                                                                                                                                      |
| IntS6                      | 1 | IntS6_Intragenic_(2,23)                      | chrX:5638971-5638972    | CG3125          | FBgn0261383                                                                                                                                                                                                                                                                                                                                                                                                                                                                                                                                                                                                                                                                                                                                                                                                                                                                                                                                                                                                                                                                                                                                                                                                                                                                                                                                                                                                                                                                                                                                                                                                                                                                                                                                                                                                                                                                                                                                                                                                                                                                                                                                                                                                                                                                                                                                                                                                                                                                                                                                                                                                                                                                                                                                                                                                                                                                                                                                                                                                                                                                                                                                                                                                                                                                                                                                                                                                                                                                                                                                                                                                                                                                                                                                                                                                                                                                                                                                                                                                                                                      |
| Grip                       | 1 | Grip_Intragenic_(5,93)                       | chrX:5863711-5863712    | CG14447         | FBgn0029830                                                                                                                                                                                                                                                                                                                                                                                                                                                                                                                                                                                                                                                                                                                                                                                                                                                                                                                                                                                                                                                                                                                                                                                                                                                                                                                                                                                                                                                                                                                                                                                                                                                                                                                                                                                                                                                                                                                                                                                                                                                                                                                                                                                                                                                                                                                                                                                                                                                                                                                                                                                                                                                                                                                                                                                                                                                                                                                                                                                                                                                                                                                                                                                                                                                                                                                                                                                                                                                                                                                                                                                                                                                                                                                                                                                                                                                                                                                                                                                                                                                      |
| pigs                       | 1 | pigs_Intragenic_(2,69)                       | chrX:6495591-6495592    | CG3973          | FBgn0029881                                                                                                                                                                                                                                                                                                                                                                                                                                                                                                                                                                                                                                                                                                                                                                                                                                                                                                                                                                                                                                                                                                                                                                                                                                                                                                                                                                                                                                                                                                                                                                                                                                                                                                                                                                                                                                                                                                                                                                                                                                                                                                                                                                                                                                                                                                                                                                                                                                                                                                                                                                                                                                                                                                                                                                                                                                                                                                                                                                                                                                                                                                                                                                                                                                                                                                                                                                                                                                                                                                                                                                                                                                                                                                                                                                                                                                                                                                                                                                                                                                                      |
| CG12541                    | 1 | CG12541_Intragenic_(7,9)                     | chrX:6941051-6941052    | CG12541         | FBgn0029930                                                                                                                                                                                                                                                                                                                                                                                                                                                                                                                                                                                                                                                                                                                                                                                                                                                                                                                                                                                                                                                                                                                                                                                                                                                                                                                                                                                                                                                                                                                                                                                                                                                                                                                                                                                                                                                                                                                                                                                                                                                                                                                                                                                                                                                                                                                                                                                                                                                                                                                                                                                                                                                                                                                                                                                                                                                                                                                                                                                                                                                                                                                                                                                                                                                                                                                                                                                                                                                                                                                                                                                                                                                                                                                                                                                                                                                                                                                                                                                                                                                      |
| CG43867                    | 1 | CG43867_Intragenic_(5,95)                    | chrX:736391-736392      | CG43867         | FBgn0264449                                                                                                                                                                                                                                                                                                                                                                                                                                                                                                                                                                                                                                                                                                                                                                                                                                                                                                                                                                                                                                                                                                                                                                                                                                                                                                                                                                                                                                                                                                                                                                                                                                                                                                                                                                                                                                                                                                                                                                                                                                                                                                                                                                                                                                                                                                                                                                                                                                                                                                                                                                                                                                                                                                                                                                                                                                                                                                                                                                                                                                                                                                                                                                                                                                                                                                                                                                                                                                                                                                                                                                                                                                                                                                                                                                                                                                                                                                                                                                                                                                                      |
| Lim1                       | 1 | Lim1_Intragenic_(5,34)                       | chrX:8663611-8663612    | CG11354         | FBgn0026411                                                                                                                                                                                                                                                                                                                                                                                                                                                                                                                                                                                                                                                                                                                                                                                                                                                                                                                                                                                                                                                                                                                                                                                                                                                                                                                                                                                                                                                                                                                                                                                                                                                                                                                                                                                                                                                                                                                                                                                                                                                                                                                                                                                                                                                                                                                                                                                                                                                                                                                                                                                                                                                                                                                                                                                                                                                                                                                                                                                                                                                                                                                                                                                                                                                                                                                                                                                                                                                                                                                                                                                                                                                                                                                                                                                                                                                                                                                                                                                                                                                      |
| fend                       | 1 | fend_Intragenic_(4,88)                       | chrX:9025911-9025912    | CG12664         | FBgn0030090                                                                                                                                                                                                                                                                                                                                                                                                                                                                                                                                                                                                                                                                                                                                                                                                                                                                                                                                                                                                                                                                                                                                                                                                                                                                                                                                                                                                                                                                                                                                                                                                                                                                                                                                                                                                                                                                                                                                                                                                                                                                                                                                                                                                                                                                                                                                                                                                                                                                                                                                                                                                                                                                                                                                                                                                                                                                                                                                                                                                                                                                                                                                                                                                                                                                                                                                                                                                                                                                                                                                                                                                                                                                                                                                                                                                                                                                                                                                                                                                                                                      |
| nub/pdm2                   | 1 | nub/pdm2#_Intragenic_(3,17)                  | chr2L:12613231-12613232 | CG34395/CG12287 | FBgn0065424/FBgn000439                                                                                                                                                                                                                                                                                                                                                                                                                                                                                                                                                                                                                                                                                                                                                                                                                                                                                                                                                                                                                                                                                                                                                                                                                                                                                                                                                                                                                                                                                                                                                                                                                                                                                                                                                                                                                                                                                                                                                                                                                                                                                                                                                                                                                                                                                                                                                                                                                                                                                                                                                                                                                                                                                                                                                                                                                                                                                                                                                                                                                                                                                                                                                                                                                                                                                                                                                                                                                                                                                                                                                                                                                                                                                                                                                                                                                                                                                                                                                                                                                                           |
| ITP/CG4622                 | 1 | ITP/CG4622_Intragenic_(3,14)                 | chr2R:20432181-20432182 | CG13586/CG4622  | FBgn0035023/1/2/3/4/5/6/7/8/9/10/11/12/13/14/15/16/17/18/19/20/21/22/23/24/25/26/27/28/29/30/31/32/33/34/35/36/37/38/39/40/41/42/43/44/45/46/47/48/49/50/51/52/53/54/55/56/57/58/59/60/61/62/63/64/65/66/67/68/69/70/71/72/73/74/75/76/77/78/79/80/81/82/83/84/85/86/87/88/89/90/91/92/93/94/95/96/97/98/99/100/101/102/103/104/105/106/107/108/109/110/111/112/113/114/115/116/117/118/119/120/121/122/123/124/125/126/127/128/129/130/131/132/133/134/135/136/137/138/139/140/141/142/143/144/145/146/147/148/149/150/151/152/153/154/155/156/157/158/159/160/161/162/163/164/165/166/167/168/169/170/171/172/173/174/175/176/177/178/179/180/181/182/183/184/185/186/187/188/189/190/191/192/193/194/195/196/197/198/199/200/201/202/203/204/205/206/207/208/209/210/211/212/213/214/215/216/217/218/219/220/221/222/223/224/225/226/227/228/229/230/231/232/233/234/235/236/237/238/239/240/241/242/243/244/245/246/247/248/249/250/251/252/253/254/255/256/257/258/259/260/261/262/263/264/265/266/267/268/269/270/271/272/273/274/275/276/277/278/279/280/281/282/283/284/285/286/287/288/289/290/291/292/293/294/295/296/297/298/299/300/301/302/303/304/305/306/307/308/309/310/311/312/313/314/315/316/317/318/319/320/321/322/323/324/325/326/327/328/329/330/331/332/333/334/335/336/337/338/339/340/341/342/343/344/345/346/347/348/349/350/351/352/353/354/355/356/357/358/359/360/361/362/363/364/365/366/367/368/369/370/371/372/373/374/375/376/377/378/379/380/381/382/383/384/385/386/387/388/389/390/391/392/393/394/395/396/397/398/399/400/401/402/403/404/405/406/407/408/409/410/411/412/413/414/415/416/417/418/419/420/421/422/423/424/425/426/427/428/429/430/431/432/433/434/435/436/437/438/439/440/441/442/443/444/445/446/447/448/449/450/451/452/453/454/455/456/457/458/459/460/461/462/463/464/465/466/467/468/469/470/471/472/473/474/475/476/477/478/479/480/481/482/483/484/485/486/487/488/489/490/491/492/493/494/495/496/497/498/499/500/501/502/503/504/505/506/507/508/509/510/511/512/513/514/515/516/517/518/519/520/521/522/523/524/525/526/527/528/529/530/531/532/533/534/535/536/537/538/539/540/541/542/543/544/545/546/547/548/549/550/551/552/553/554/555/556/557/558/559/560/561/562/563/564/565/566/567/568/569/570/571/572/573/574/575/576/577/578/579/580/581/582/583/584/585/586/587/588/589/590/591/592/593/594/595/596/597/598/599/600/601/602/603/604/605/606/607/608/609/610/611/612/613/614/615/616/617/618/619/620/621/622/623/624/625/626/627/628/629/630/631/632/633/634/635/636/637/638/639/640/641/642/643/644/645/646/647/648/649/650/651/652/653/654/655/656/657/658/659/660/661/662/663/664/665/666/667/668/669/670/671/672/673/674/675/676/677/678/679/680/681/682/683/684/685/686/687/688/689/690/691/692/693/694/695/696/697/698/699/700/701/702/703/704/705/706/707/708/709/710/711/712/713/714/715/716/717/718/719/720/721/722/723/724/725/726/727/728/729/730/731/732/733/734/735/736/737/738/739/740/741/742/743/744/745/746/747/748/749/750/751/752/753/754/755/756/757/758/759/760/761/762/763/764/765/766/767/768/769/770/771/772/773/774/775/776/777/778/779/780/781/782/783/784/785/786/787/788/789/790/791/792/793/794/795/796/797/798/799/800/801/802/803/804/805/806/807/808/809/810/811/812/813/814/815/816/817/818/819/820/821/822/823/824/825/826/827/828/829/830/831/832/833/834/835/836/837/838/839/840/841/842/843/844/845/846/847/848/849/850/851/852/853/854/855/856/857/858/859/860/861/862/863/864/865/866/867/868/869/870/871/872/873/874/875/876/877/878/879/880/881/882/883/884/885/886/887/888/889/890/891/892/893/894/895/896/897/898/899/900/901/902/903/904/905/906/907/908/909/910/911/912/913/914/915/916/917/918/919/920/921/922/923/924/925/926/927/928/929/930/931/932/933/934/935/936/937/938/939/940/941/942/943/944/945/946/947/948/949/950/951/952/953/954/955/956/957/958/959/960/961/962/963/964/965/966/967/968/969/970/971/972/973/974/975/976/977/978/979/980/981/982/983/984/985/986/987/988/989/990/991/992/993/994/995/996/997/998/999/1000 |
| kermit/Lpin                | 1 | kermit/Lpin_Intragenic_(2,2)                 | chr2R:4035411-4035412   | CG11546/CG8709  | FBgn0010504/3/4/5/6/7/8/9/10/11/12/13/14/15/16/17/18/19/20/21/22/23/24/25/26/27/28/29/30/31/32/33/34/35/36/37/38/39/40/41/42/43/44/45/46/47/48/49/50/51/52/53/54/55/56/57/58/59/60/61/62/63/64/65/66/67/68/69/70/71/72/73/74/75/76/77/78/79/80/81/82/83/84/85/86/87/88/89/90/91/92/93/94/95/96/97/98/99/100                                                                                                                                                                                                                                                                                                                                                                                                                                                                                                                                                                                                                                                                                                                                                                                                                                                                                                                                                                                                                                                                                                                                                                                                                                                                                                                                                                                                                                                                                                                                                                                                                                                                                                                                                                                                                                                                                                                                                                                                                                                                                                                                                                                                                                                                                                                                                                                                                                                                                                                                                                                                                                                                                                                                                                                                                                                                                                                                                                                                                                                                                                                                                                                                                                                                                                                                                                                                                                                                                                                                                                                                                                                                                                                                                      |
| Cyp49a1/G- $\alpha$ pha47A | 1 | Cyp49a1/G- $\alpha$ pha47A_Intragenic_(2,83) | chr2R:6344061-6344062   | CG18377/CG2204  | FBgn0033524/2/3/4/5/6/7/8/9/10/11/12/13/14/15/16/17/18/19/20/21/22/23/24/25/26/27/28/29/30/31/32/33/34/35/36/37/38/39/40/41/42/43/44/45/46/47/48/49/50/51/52/53/54/55/56/57/58/59/60/61/62/63/64/65/66/67/68/69/70/71/72/73/74/75/76/77/78/79/80/81/82/83/84/85/86/87/88/89/90/91/92/93/94/95/96/97/98/99/100                                                                                                                                                                                                                                                                                                                                                                                                                                                                                                                                                                                                                                                                                                                                                                                                                                                                                                                                                                                                                                                                                                                                                                                                                                                                                                                                                                                                                                                                                                                                                                                                                                                                                                                                                                                                                                                                                                                                                                                                                                                                                                                                                                                                                                                                                                                                                                                                                                                                                                                                                                                                                                                                                                                                                                                                                                                                                                                                                                                                                                                                                                                                                                                                                                                                                                                                                                                                                                                                                                                                                                                                                                                                                                                                                    |
| CG43954/Lasp               | 1 | CG43954/Lasp_Intragenic_(2,64)               | chr3L:16694531-16694532 | CG43954/CG3849  | FBgn0264605/2/3/4/5/6/7/8/9/10/11/12/13/14/15/16/17/18/19/20/21/22/23/24/25/26/27/28/29/30/31/32/33/34/35/36/37/38/39/40/41/42/43/44/45/46/47/48/49/50/51/52/53/54/55/56/57/58/59/60/61/62/63/64/65/66/67/68/69/70/71/72/73/74/75/76/77/78/79/80/81/82/83/84/85/86/87/88/89/90/91/92/93/94/95/96/97/98/99/100                                                                                                                                                                                                                                                                                                                                                                                                                                                                                                                                                                                                                                                                                                                                                                                                                                                                                                                                                                                                                                                                                                                                                                                                                                                                                                                                                                                                                                                                                                                                                                                                                                                                                                                                                                                                                                                                                                                                                                                                                                                                                                                                                                                                                                                                                                                                                                                                                                                                                                                                                                                                                                                                                                                                                                                                                                                                                                                                                                                                                                                                                                                                                                                                                                                                                                                                                                                                                                                                                                                                                                                                                                                                                                                                                    |
| Cha/VACT                   | 1 | Cha/VACT_Intragenic_(2,06)                   | chr3R:14534501-14534502 | CG12345/CG32848 | FBgn0000302/5/6/7/8/9/10/11/12/13/14/15/16/17/18/19/20/21/22/23/24/25/26/27/28/29/30/31/32/33/34/35/36/37/38/39/40/41/42/43/44/45/46/47/48/49/50/51/52/53/54/55/56/57/58/59/60/61/62/63/64/65/66/67/68/69/70/71/72/73/74/75/76/77/78/79/80/81/82/83/84/85/86/87/88/89/90/91/92/93/94/95/96/97/98/99/100                                                                                                                                                                                                                                                                                                                                                                                                                                                                                                                                                                                                                                                                                                                                                                                                                                                                                                                                                                                                                                                                                                                                                                                                                                                                                                                                                                                                                                                                                                                                                                                                                                                                                                                                                                                                                                                                                                                                                                                                                                                                                                                                                                                                                                                                                                                                                                                                                                                                                                                                                                                                                                                                                                                                                                                                                                                                                                                                                                                                                                                                                                                                                                                                                                                                                                                                                                                                                                                                                                                                                                                                                                                                                                                                                          |
