# Supplementary material for: Genome-Wide Mapping of Collier In Vivo Binding Sites Highlights Its Hierarchical Position in Different Transcription Regulatory Networks
Source: PubMed Central journal article supplement (PMC4512700; doi:10.1371/journal.pone.0133387), 2015-07-23
Supplement: pone.0133387.s010.pdf [file pone.0133387.s010.pdf]

**Table S2. Genomic coordinates and annotation of candidate Col-regulated CRM**

Curated annotation of the Col binding site

| Col target gene | Open chromatin marks | Mef-2 binding site<0.5 kb | Reporter Name       | Previously characterized CRMs<br><a href="http://redfly.ccr.buffalo.edu/">http://redfly.ccr.buffalo.edu/</a> | Genomic coordinates (size)          | MEME Col binding site<br><b>mutated positions</b><br>*polymorphism      |
|-----------------|----------------------|---------------------------|---------------------|--------------------------------------------------------------------------------------------------------------|-------------------------------------|-------------------------------------------------------------------------|
| <i>Ama</i>      | +                    |                           | <i>Ama_Col</i>      |                                                                                                              | Chr3R: 2.587.010-2.587.909 (899)    | CCT <b>CCC</b> ATGGGAACG                                                |
| <i>ap</i>       |                      |                           | <i>ap_Col</i>       |                                                                                                              | Chr2R: 1.623.820-1.625.439 (1619)   | ACT <b>CCCTTCGGAATA</b><br>--// 603pb //--<br>GA <b>ACCCAAGGGACGA</b>   |
| <i>cnc</i>      |                      |                           | <i>cnc_Col</i>      |                                                                                                              | Chr3R: 19.037.100-19.038.139 (1039) | AATTct*CCA <b>GGG</b> ACC                                               |
| <i>eya</i>      | +                    |                           | <i>eya_Col</i>      |                                                                                                              | Chr2L: 6.540.104-6.541.545 (1441)   | AGAC <b>CCC</b> CAGGGATG<br>--// 375pb //--<br>GCA <b>CCC</b> CAGGGCTTA |
| <i>jing</i>     | +                    |                           | <i>jing_Col</i>     |                                                                                                              | Chr2R: 2.482.100-2.483.002 (903)    | TGCCCGCT <b>GGG</b> AATT                                                |
| <i>Mrtf</i>     |                      | +                         | <i>Mrtf_Col</i>     |                                                                                                              | Chr3L: 2.744.715-2.745.692 (978)    | TCCCCCCT <b>GGG</b> AATT                                                |
| <i>nerfin-1</i> |                      |                           | <i>nerfin-1_Col</i> | PMID:19056518<br>Kuzin et al., 2008                                                                          | Chr3L: 907324-908228 (900)          | ATT <b>CCCCTGGCAAAA</b><br>--// 20pb //--<br>ATCGCCTT <b>GGG</b> AATA   |
| <i>Oaz</i>      | +                    |                           | <i>Oaz_Col</i>      |                                                                                                              | Chr2R: 10.339.692-10.340.791 (1099) | AATCCCAG <b>GGG</b> AACC                                                |
| <i>so</i>       | +                    | +                         | <i>so_Col</i>       |                                                                                                              | Chr2R: 3.320.280 -3.321.219 (939)   | AATGCCCCG <b>GGG</b> AGG                                                |
| <i>tkv</i>      | +                    | +                         | <i>tkv_Col</i>      | PMID:19890324<br>Zinzen et al., 2009                                                                         | Chr2L: 5.245.055-5.246.039 (984)    | GAT <b>CCC</b> CAGGGAATT                                                |
| <i>col</i>      | +                    | +                         | <i>col2.3-0.9</i>   | PMID:20056681<br>Dubois et al., 2010                                                                         | Chr2R: 10.687.378-10.688.751 (1373) | ATGT <b>CCC</b> CAGACATC                                                |
